# Supplementary figures and images for: The Bladder Microbiome Is Associated with Epithelial–Mesenchymal Transition in Muscle Invasive Urothelial Bladder Carcinoma
Source: MDPI journal article supplement (doi:10.3390/cancers13153649), 2021-07-21

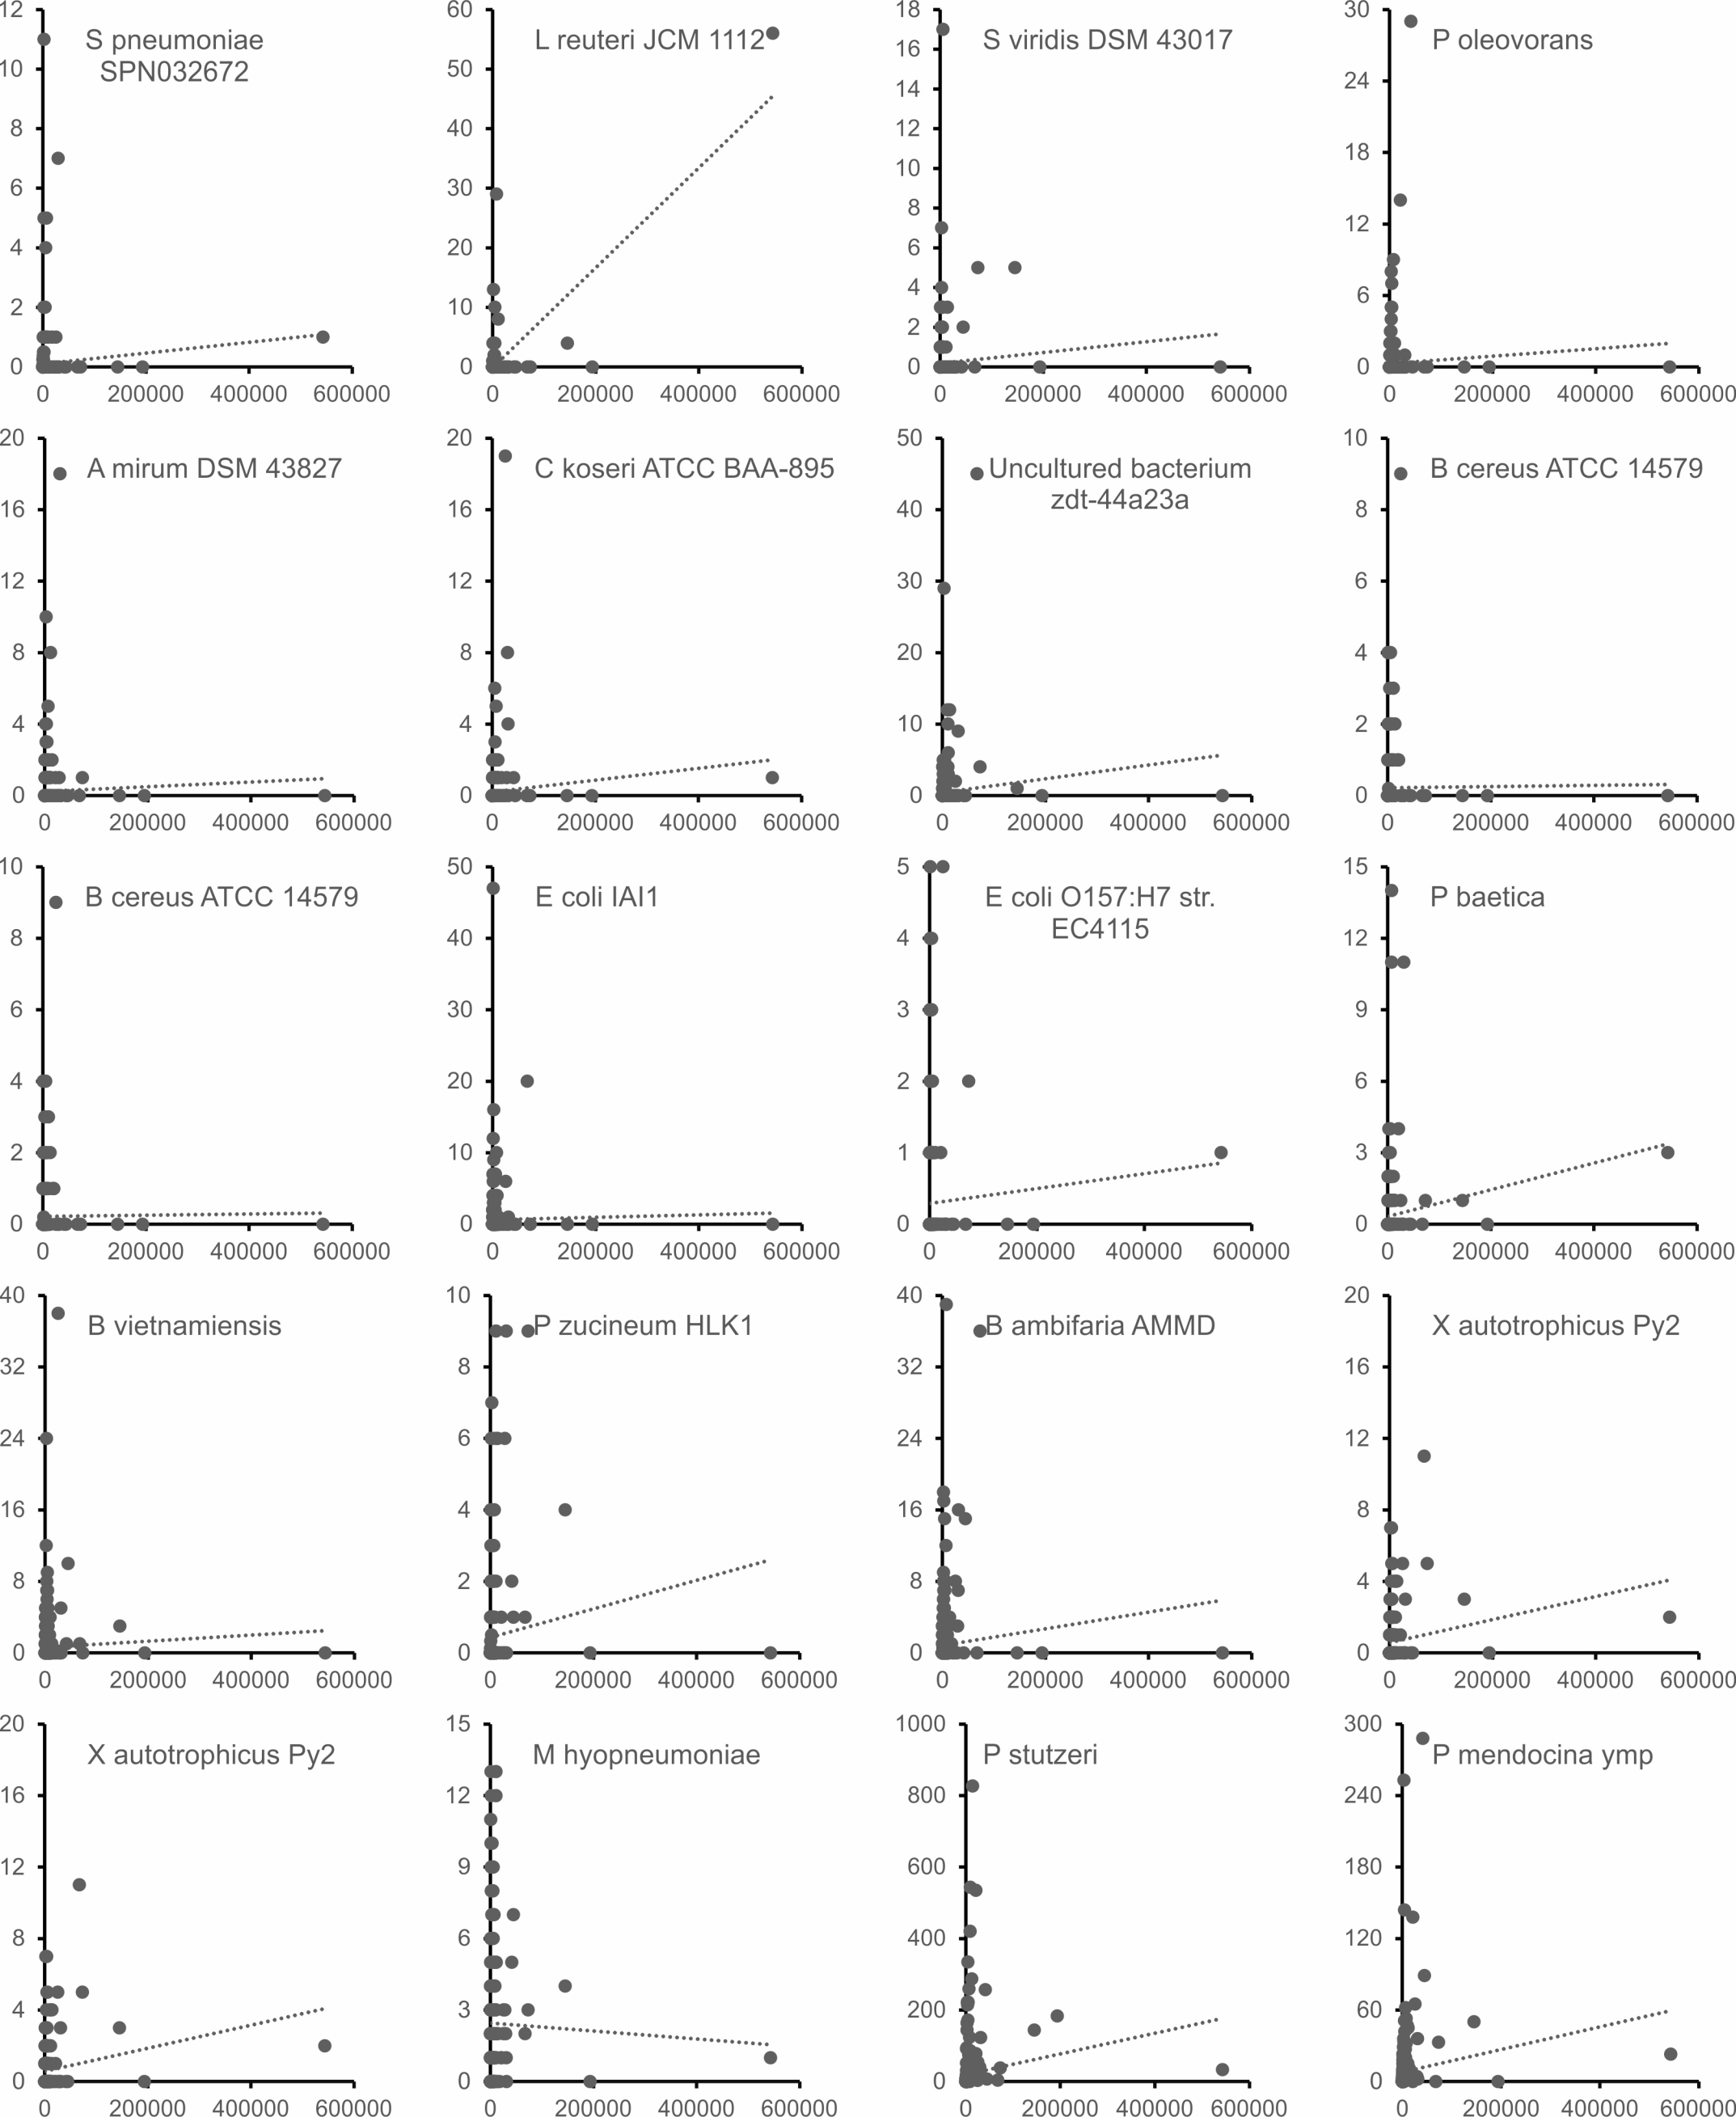

Supplement: s1 [file s1]

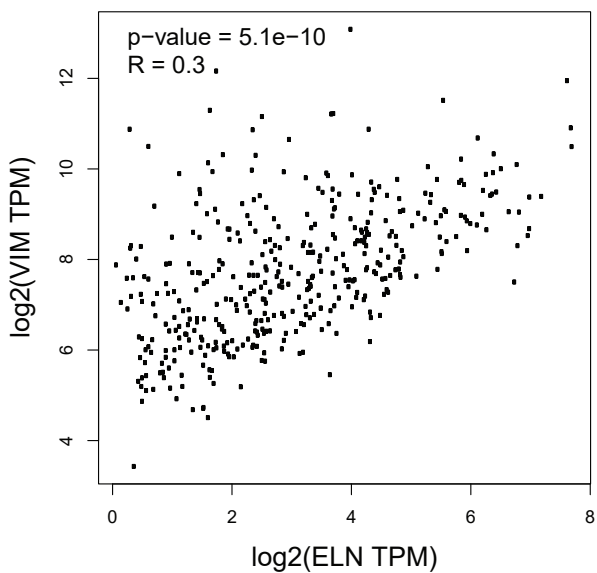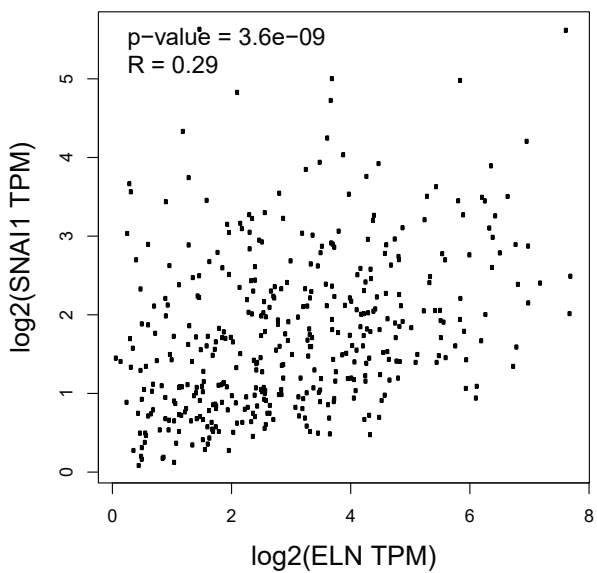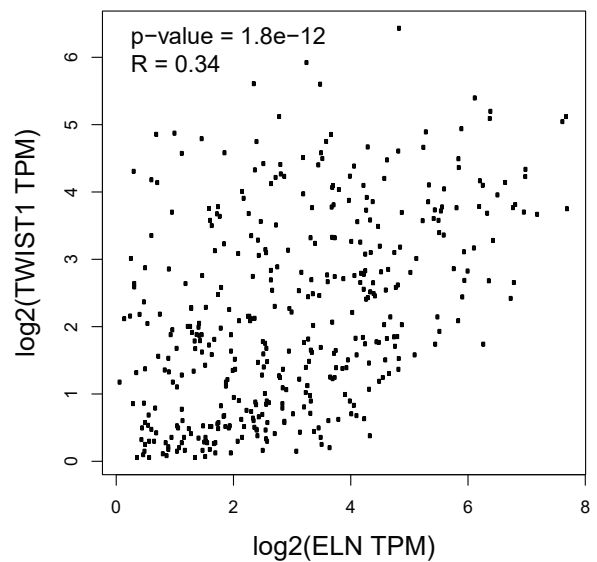

Supplement: s1 [file s1]
